# Supplementary material for: Durham University students’ experiences of asymptomatic COVID-19 testing: a qualitative study
Source: HighWire-hosted journal article supplement (doi:10.1136/bmjopen-2021-055644), 2021-12-01
Supplement: bmjopen-2021-055644supp001_data_supplement.pdf [file bmjopen-2021-055644supp001_data_supplement.pdf]

## Durham University Students' Qualitative Interview Guide

Behavioural Science and Insights Unit (BSIU)<sup>1</sup>

### 1. Very briefly, tell me a little bit about yourself.

*REQUIRED:* Gender? Undergrad or postgrad? Which college? Did you take part in the university testing programme?

*PROMPT:* What are you studying and which year are you in? What is your living situation – are you at home or university right now?

### 2. Tell me about any experiences you have of being tested at University.

*PROMPT:* How did you find out about lateral flow (rapid) testing?

*PROMPT:* Was it easy it for you to get tested at University?

*PROMPT:* Was it pleasant/unpleasant?

**\*\*If NOT been tested, skip to question 4\*\***

### 3. What motivated you to get tested at University?

*PROMPT:* Were you worried about contracting Covid-19 or passing it onto others?

*PROMPT:* Did you think it was likely/possible that you had Covid-19?

*PROMPT:* Were there any incentives to get tested (food, drink, prize)?

**\*\*If has been tested, skip to question 5\*\***

### 4. If no experience, why not?

*PROMPT:* Did you know how you could get one/how to do it?

*PROMPT:* Did you want to get tested?

**5. Tell me about any difficulties there were for you to get tested when you were at University.**

*PROMPT:* Was it convenient? (location, booking slots/allocated slots etc)

*PROMPT:* Were you worried about the impact of a positive test? (financial, not wanting to isolate, impact on social life)

**6. What did people around you think about testing?**

*PROMPT:* What did your housemates think about testing? Did they get tested?

*PROMPT:* What did your family and friends think? Did they think you should get tested?

**\*\*If has NOT been tested, skip to questions 9 and 10\*\***

**7. What happened after you received the test result?**

*PROMPT:* How did you feel? What did you do?

*PROMPT:* Did you trust the result?

*PROMPT:* Did you think differently about the possibility of infecting others?

**8. How did the test result influence your behaviour, if at all?**

*PROMPT:* i.e. social distancing, hand washing, socialising, meeting others etc.

**\*\*If has been tested, skip to question 11\*\***

**9. If you had been tested, how do you think you would have reacted?**

*PROMPT:* Would you have trusted the result?

*PROMPT:* Would you have thought differently about the possibility of infecting others?

**10. To what extent would the test result have influenced your behaviour, if at all?**

*PROMPT: I.e. social distancing, hand washing, socialising, meeting others etc.*

**11. How important do you think it is to get tested?**

*PROMPT: For you personally, and for the wider population.*

*PROMPT: What do you think the impact will be of getting tested? (Transmission, infection rates, mental health and wellbeing, financial implications etc.)*

*PROMPT: Do you think it is effective to reduce the impact of COVID-19 on yourself, and on others?*

*PROMPT: Have your views on this changed at any point, for example depending on whether you are at university or home?*

**12. How likely are you to get tested in future?**

*PROMPT: Is it something that you would want to do?*

**13. If you did want to get tested, what would make it easier to do so in the future?**

*PROMPT: (location, others getting tested, time, reminders?)*

**14. Is there anything else you would like to add?**

*PROMPT: Anything about testing that I haven't asked you about?*
